# Supplementary material for: In One Fell Sweep: Modeling Exchange, Hyperfine and Dipolar Interactions from EPR Spectra of Copper(II) Spin Triangles
Source: MDPI journal article supplement (doi:10.3390/magnetochemistry9100217), 2023-10-06
Supplement: s1 [file s1]

## Supporting information

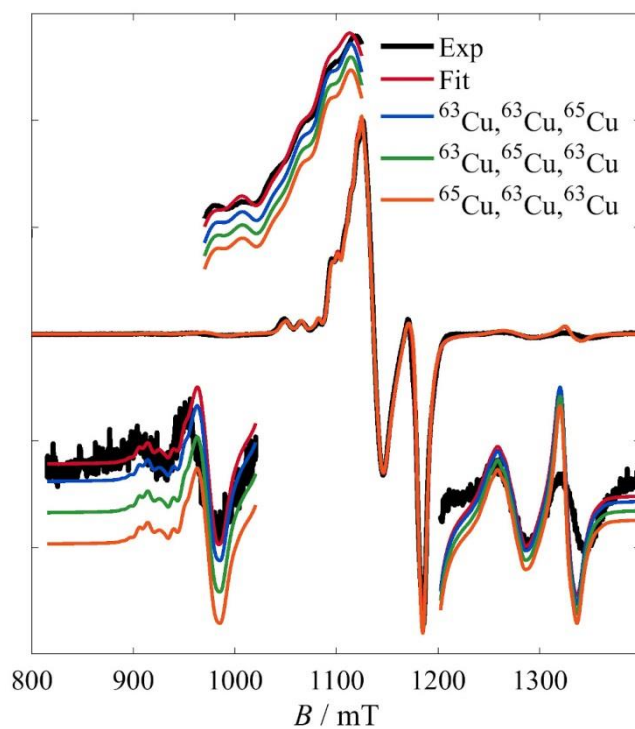

Figure S1. Comparison of best-fit spectrum for complex **1** calculated by considering natural isotopic abundances on each site, with spectra assuming different isotopologues.

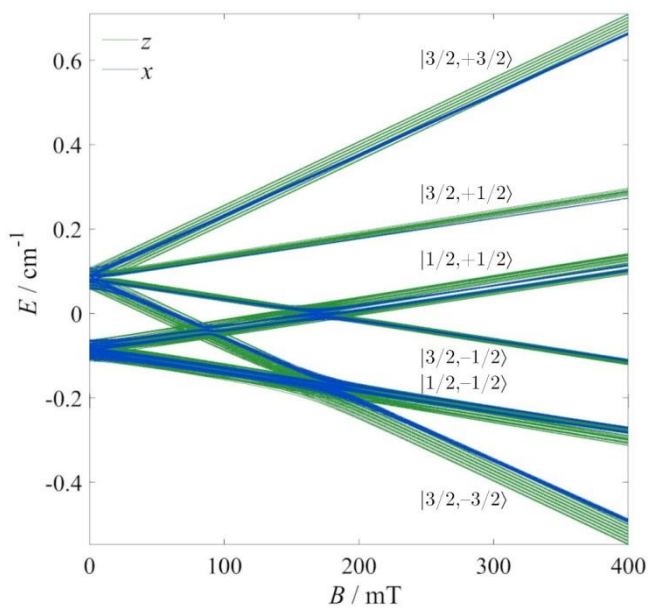

Figure S2. Zeeman diagram of the low field region at the *z*- and *x*-orientations, according to the best fit to the spectrum of complex **1**, indicating the *S* and *M<sub>S</sub>* characters of the magnetic levels.
